# Supplementary material for: Degradable and Photocatalytic Antibacterial Au-TiO2/Sodium Alginate Nanocomposite Films for Active Food Packaging
Source: PubMed Central journal article supplement (PMC6266112; doi:10.3390/nano8110930), 2018-11-08
Supplement: nanomaterials-08-00930-s001.pdf [file nanomaterials-08-00930-s001.pdf]

Article

# Degradable and Photocatalytic Antibacterial Au-TiO<sub>2</sub>/Sodium Alginate Nanocomposite Films for Active Food Packaging

Siying Tang <sup>1</sup>, Zhe Wang <sup>2,3,4,\*</sup>, Penghui Li <sup>1,3</sup>, Wan Li <sup>1</sup>, Chengyong Li <sup>5</sup>, Yi Wang <sup>4</sup> and Paul K. Chu <sup>1,\*</sup>

<sup>1</sup> Department of Physics and Department of Materials Science and Engineering, City University of Hong Kong, Tat Chee Avenue, Kowloon, Hong Kong, China; siyintang2-c@my.cityu.edu.hk (S.T.); ph.li@siat.ac.cn (P.L.); wanli6-c@my.cityu.edu.hk (W.L.)

<sup>2</sup> Food Science and Processing Research Center, Shenzhen University, Shenzhen 518060, China

<sup>3</sup> Shenzhen Institutes of Advanced Technology, Chinese Academy of Sciences, Shenzhen 518055, China

<sup>4</sup> Department of Applied Biology and Chemical Technology, The Hong Kong Polytechnic University, Kowloon, Hong Kong, China; yi.wy.wang@polyu.edu.hk

<sup>5</sup> Shenzhen Institute of Guangdong Ocean University, Shenzhen 518108, China; cyli@gdou.edu.cn

\* Correspondence: wangzhejida2008@163.com (Z.W.); paul.chu@cityu.edu.hk (P.K.C.);

Tel: +852-3442-7724 (P.K.C.)

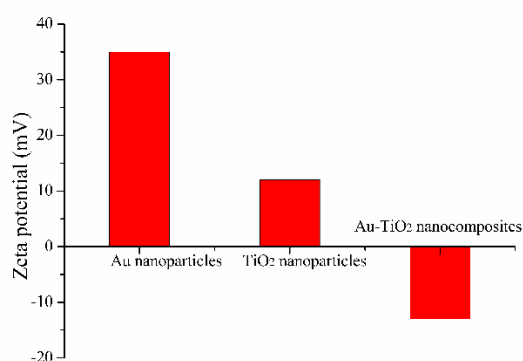

**Figure S1.** Zeta potentials of Au nanoparticles, TiO<sub>2</sub> nanoparticles, and Au-TiO<sub>2</sub> nanocomposites.
